# Supplementary material
Source: MDPI journal article supplement (https://www.mdpi.com/2306-5710/9/1/15)
Supplement: s1 [file s1]

**Table S1.** Mean concentration and standard deviation of volatile sulfur compounds in Shiraz wines according to the type of closure.

|                |           | H <sub>2</sub> S <sup>a</sup><br>(µg/L) | MeSH <sup>a</sup><br>(µg/L) | EtSH <sup>a</sup><br>(µg/L) | 2ME <sup>a</sup><br>(µg/L) | DMS <sup>b</sup><br>(µg/L) | DMSP <sup>a</sup><br>(µg éq. DMS/L) | DES <sup>b</sup><br>(µg/L) | SMTA <sup>b</sup><br>(µg/L) | DMDS <sup>b</sup><br>(µg/L) | ETA <sup>b</sup><br>(µg/L) | DEDS <sup>b</sup><br>(µg/L) |
|----------------|-----------|-----------------------------------------|-----------------------------|-----------------------------|----------------------------|----------------------------|-------------------------------------|----------------------------|-----------------------------|-----------------------------|----------------------------|-----------------------------|
| <b>0 month</b> |           |                                         |                             |                             |                            |                            |                                     |                            |                             |                             |                            |                             |
| <b>CR1</b>     | Closure 1 | 172 ± 13                                | 5.1 ± 0.1                   | 1.8 ± 0.1                   | 58.6 ± 2.2                 | 33 ± 2                     | 155                                 | nd                         | 13.5 ± 1.6                  | nd                          | 7.7 ± 1.2                  | nd                          |
|                | Closure 2 | 188 ± 2                                 | 5.4 ± 0.1                   | 1.9 ± 0.1                   | 60.9 ± 1.0                 | 36 ± 2                     |                                     | nd                         | 14.3 ± 0.6                  | nd                          | 8.1 ± 1.1                  | nd                          |
|                | Closure 3 | 186 ± 7                                 | 5.3 ± 0.3                   | 1.9 ± 0.2                   | 60.6 ± 0.8                 | 34 ± 1                     |                                     | nd                         | 12.5 ± 0.7                  | nd                          | 8.4 ± 0.3                  | nd                          |
|                | Closure 4 | 180 ± 10                                | 5.1 ± 0.2                   | 1.9 ± 0.0                   | 60.1 ± 0.7                 | 33 ± 3                     |                                     | nd                         | 14.3 ± 0.6                  | nd                          | 4.9 ± 2.2                  | nd                          |
| <b>CR2</b>     | Closure 1 | 37 ± 1                                  | 5.1 ± 0.2                   | 0.0 ± 0.0                   | 1.7 ± 0.1                  | 75 ± 7                     | 304                                 | nd                         | 2.4 ± 0.1                   | nd                          | nd                         | nd                          |
|                | Closure 2 | 38 ± 1                                  | 5.3 ± 0.3                   | 0.0 ± 0.0                   | 1.7 ± 0.1                  | 84 ± 6                     |                                     | nd                         | 2.3 ± 0.2                   | nd                          | nd                         | nd                          |
|                | Closure 3 | 36.4 ± 0.4                              | 5.0 ± 0.1                   | 0.0 ± 0.0                   | 1.68 ± 0.04                | 71 ± 16                    |                                     | nd                         | 2.2 ± 0.3                   | nd                          | nd                         | nd                          |
|                | Closure 4 | 38.3 ± 0.4                              | 5.4 ± 0.2                   | 0.0 ± 0.0                   | 1.76 ± 0.02                | 77.0 ± 0.2                 |                                     | nd                         | 2.0 ± 0.1                   | nd                          | nd                         | nd                          |
| <b>LR1</b>     | Closure 1 | 35.3 ± 0.3                              | 5.8 ± 0.2                   | 0.0 ± 0.0                   | 7.6 ± 0.1                  | 109 ± 70                   | 958                                 | nd                         | 0.9 ± 0.1                   | nd                          | nd                         | nd                          |
|                | Closure 2 | 36.4 ± 0.2                              | 5.6 ± 0.3                   | 0.0 ± 0.0                   | 7.3 ± 0.0                  | 315 ± 20                   |                                     | nd                         | 1.0 ± 0.1                   | nd                          | nd                         | nd                          |
|                | Closure 3 | 37 ± 1                                  | 5.9 ± 0.7                   | 0.0 ± 0.0                   | 7.7 ± 0.3                  | 311 ± 1                    |                                     | nd                         | 0.907 ± 0.001               | nd                          | nd                         | nd                          |
|                | Closure 4 | 35 ± 1                                  | 5.4 ± 0.3                   | 0.0 ± 0.0                   | 7.4 ± 0.1                  | 311 ± 14                   |                                     | nd                         | 0.91 ± 0.02                 | nd                          | nd                         | nd                          |
| <b>LR2</b>     | Closure 1 | 183 ± 6                                 | 5.3 ± 0.1                   | 1.2 ± 0.1                   | 36.9 ± 0.7                 | 77 ± 17                    | 283                                 | nd                         | 2.30 ± 0.04                 | nd                          | nd                         | nd                          |
|                | Closure 2 | 183 ± 4                                 | 5.0 ± 0.1                   | 1.2 ± 0.0                   | 36.8 ± 0.4                 | 106 ± 23                   |                                     | nd                         | 2.8 ± 0.5                   | nd                          | nd                         | nd                          |
|                | Closure 3 | 180 ± 1                                 | 5.0 ± 0.3                   | 1.2 ± 0.1                   | 36.6 ± 1.0                 | 103 ± 20                   |                                     | nd                         | 2.9 ± 0.3                   | nd                          | 6.7 ± 0.2                  | nd                          |
|                | Closure 4 | 173 ± 4                                 | 4.6 ± 0.2                   | 1.1 ± 0.1                   | 35.7 ± 0.8                 | 83 ± 18                    |                                     | nd                         | 2.7 ± 0.4                   | nd                          | nd                         | nd                          |
| <b>LR3</b>     | Closure 1 | 119 ± 6                                 | 3.8 ± 0.1                   | 0.0 ± 0.0                   | 14.0 ± 0.3                 | 73 ± 7                     | 400                                 | nd                         | 17.8 ± 2.6                  | nd                          | 8.7 ± 1.3                  | nd                          |
|                | Closure 2 | 119 ± 2                                 | 3.7 ± 0.1                   | 0.0 ± 0.0                   | 13.8 ± 0.4                 | 35 ± 1                     |                                     | nd                         | 19.7 ± 1.8                  | nd                          | 7.8 ± 0.8                  | nd                          |
|                | Closure 3 | 121 ± 2                                 | 3.8 ± 0.1                   | 0.0 ± 0.0                   | 13.9 ± 0.3                 | 59 ± 26                    |                                     | nd                         | 19.0 ± 2.4                  | nd                          | 9.6 ± 0.4                  | nd                          |
|                | Closure 4 | 119 ± 8                                 | 3.5 ± 0.1                   | 0.0 ± 0.0                   | 13.9 ± 0.6                 | 41 ± 7                     |                                     | nd                         | 21.2 ± 4.0                  | nd                          | 9.9 ± 0.9                  | nd                          |
| <b>LR4</b>     | Closure 1 | 30 ± 2                                  | 2.6 ± 0.4                   | 0.0 ± 0.0                   | 2.1 ± 0.1                  | 7.4 <sup>a,*</sup>         | 119                                 | nd                         | 2.9 ± 0.3                   | nd                          | nd                         | nd                          |
|                | Closure 2 | 30 ± 1                                  | 2.6 ± 0.1                   | 0.0 ± 0.0                   | 2.2 ± 0.1                  | 4.1 <sup>a,*</sup>         |                                     | nd                         | 2.8 ± 0.2                   | nd                          | nd                         | nd                          |
|                | Closure 3 | 32.1 ± 0.2                              | 2.7 ± 0.2                   | 0.0 ± 0.0                   | 2.0 ± 0.1                  | 4.8 <sup>a,*</sup>         |                                     | nd                         | 3.0 ± 0.7                   | nd                          | nd                         | nd                          |
|                | Closure 4 | 31.3 ± 0.3                              | 2.3 ± 0.2                   | 0.0 ± 0.0                   | 2.4 ± 0.2                  | 4.8 <sup>a,*</sup>         |                                     | nd                         | 3.3 ± 0.2                   | nd                          | nd                         | nd                          |
| <b>3 month</b> |           |                                         |                             |                             |                            |                            |                                     |                            |                             |                             |                            |                             |
| <b>CR1</b>     | Closure 1 | 169 ± 5                                 | 18.3 ± 1.7                  | 2.2 ± 0.3                   | 42.9 ± 1.2                 | 180 ± 21                   | 122 ± 7                             | nd                         | 14.2 ± 0.5                  | nd                          | 8.7 ± 0.2                  | nd                          |
|                | Closure 2 | 166 ± 3                                 | 15.9 ± 0.5                  | 2.2 ± 0.1                   | 45.1 ± 2.5                 | 118 ± 19                   | 115.3 ± 0.3                         | nd                         | 12.0 ± 0.6                  | nd                          | 8.9 ± 0.1                  | nd                          |
|                | Closure 3 | 173 ± 2                                 | 14.4 ± 0.7                  | 2.5 ± 0.3                   | 45.8 ± 1.1                 | 152 ± 6                    | 118 ± 7                             | nd                         | 12.3 ± 1.2                  | nd                          | 8.9 ± 0.1                  | nd                          |
|                | Closure 4 | 169 ± 2                                 | 14.0 ± 1.1                  | 2.2 ± 0.2                   | 45.3 ± 1.0                 | 139 ± 4                    | 117 ± 1                             | nd                         | 13.3 ± 1.1                  | nd                          | 8.5 ± 1.2                  | nd                          |
| <b>CR2</b>     | Closure 1 | 84 ± 6                                  | 24.4 ± 1.7                  | nd                          | 4.3 ± 0.1                  | 481 ± 54                   | 216 ± 1                             | nd                         | nd                          | nd                          | 7.5 ± 0.1                  | nd                          |
|                | Closure 2 | 76 ± 2                                  | 18.9 ± 1.3                  | nd                          | 4.1 ± 0.1                  | 458 ± 11                   | 203 ± 5                             | nd                         | nd                          | nd                          | nd                         | nd                          |
|                | Closure 3 | 69 ± 2                                  | 20.3 ± 0.7                  | nd                          | 4.0 ± 0.2                  | 444 ± 16                   | 212 ± 4                             | nd                         | nd                          | nd                          | 7.40 ± 0.01                | nd                          |
|                | Closure 4 | 83 ± 6                                  | 18.9 ± 0.9                  | nd                          | 4.2 ± 0.2                  | 371 ± 19                   | 209 ± 1                             | nd                         | nd                          | nd                          | nd                         | nd                          |
| <b>LR1</b>     | Closure 1 | 50 ± 1                                  | 26.1 ± 0.8                  | nd                          | 9.6 ± 0.2                  | 770 <sup>**</sup> ± 88     | 523 ± 6                             | nd                         | 0.84 ± 0.04                 | nd                          | nd                         | nd                          |

|            |           |      |   |     |      |   |     |             |  |       |   |      |                 |   |     |      |   |     |    |      |   |      |    |           |  |    |
|------------|-----------|------|---|-----|------|---|-----|-------------|--|-------|---|------|-----------------|---|-----|------|---|-----|----|------|---|------|----|-----------|--|----|
|            | Closure 2 | 47.1 | ± | 0.3 | 27.2 | ± | 1.9 | nd          |  | 9.5   | ± | 0.1  | 752**           | ± | 183 | 525  | ± | 24  | nd | 1.0  | ± | 0.1  | nd | nd        |  | nd |
|            | Closure 3 | 47   | ± | 1   | 24.7 | ± | 0.7 | nd          |  | 9.5   | ± | 0.3  | 684**           | ± | 97  | 534  | ± | 36  | nd | 1.0  | ± | 0.1  | nd | nd        |  | nd |
|            | Closure 4 | 48   | ± | 1   | 25.7 | ± | 1.1 | nd          |  | 9.5   | ± | 0.3  | 521**           | ± | 124 | 509  | ± | 2   | nd | 1.00 | ± | 0.04 | nd | nd        |  | nd |
| <b>LR2</b> | Closure 1 | 135  | ± | 4   | 23.6 | ± | 2.6 | nd          |  | 11.7  | ± | 0.5  | 329             | ± | 7   | 247  | ± | 2   | nd | 2.57 | ± | 0.02 | nd | nd        |  | nd |
|            | Closure 2 | 130  | ± | 1   | 23.3 | ± | 0.6 | nd          |  | 12.08 | ± | 0.05 | 277             | ± | 44  | 235  | ± | 3   | nd | 2.6  | ± | 0.1  | nd | nd        |  | nd |
|            | Closure 3 | 132  | ± | 9   | 22.8 | ± | 1.3 | nd          |  | 11.8  | ± | 0.2  | 560**           | ± | 6   | 246  | ± | 3   | nd | 2.6  | ± | 0.1  | nd | nd        |  | nd |
|            | Closure 4 | 130  | ± | 3   | 24.6 | ± | 1.7 | nd          |  | 11.9  | ± | 0.1  | 555**           | ± | 60  | 234  | ± | 4   | nd | 2.5  | ± | 0.1  | nd | nd        |  | nd |
| <b>LR3</b> | Closure 1 | 179  | ± | 12  | 43.8 | ± | 2.5 | 1.4 ± 0.1   |  | 33.3  | ± | 1.8  | 533**           | ± | 11  | 191  | ± | 27  | nd | 20.1 | ± | 0.7  | nd | 9.7 ± 0.4 |  | nd |
|            | Closure 2 | 193  | ± | 5   | 39.9 | ± | 0.3 | 1.49 ± 0.02 |  | 37.2  | ± | 1.2  | 516**           | ± | 21  | 180  | ± | 5   | nd | 10.7 | ± | 0.8  | nd | 8.9 ± 0.2 |  | nd |
|            | Closure 3 | 187  | ± | 1   | 38.9 | ± | 1.1 | 1.6 ± 0.1   |  | 35.1  | ± | 0.6  | 313             | ± | 44  | 174  | ± | 4   | nd | 19.0 | ± | 4.8  | nd | 8.9 ± 1.6 |  | nd |
|            | Closure 4 | 181  | ± | 6   | 40.6 | ± | 1.8 | 1.42 ± 0.05 |  | 34.1  | ± | 1.2  | 353             | ± | 25  | 169  | ± | 1   | nd | 10.8 | ± | 0.2  | nd | 8.7 ± 0.7 |  | nd |
| <b>LR4</b> | Closure 1 | 51   | ± | 5   | 9.6  | ± | 2.0 | nd          |  | 9.8   | ± | 0.7  | 91 <sup>a</sup> | ± | 2   | 95   | ± | 1   | nd | nd   |   |      | nd | nd        |  | nd |
|            | Closure 2 | 46   | ± | 1   | 10.7 | ± | 1.2 | nd          |  | 10.3  | ± | 0.3  | 83 <sup>a</sup> | ± | 3   | 96   | ± | 4   | nd | nd   |   |      | nd | nd        |  | nd |
|            | Closure 3 | 47   | ± | 1   | 9.4  | ± | 0.8 | nd          |  | 10.4  | ± | 0.2  | 60 <sup>a</sup> | ± | 1   | 95   | ± | 5   | nd | nd   |   |      | nd | 7.5 ± 0.3 |  | nd |
|            | Closure 4 | 46   | ± | 2   | 11.4 | ± | 1.5 | nd          |  | 10.1  | ± | 0.2  | 60 <sup>a</sup> | ± | 1   | 91.7 | ± | 0.2 | nd | nd   |   |      | nd | nd        |  | nd |

\*data obtained with n=1. \*\*extrapolated values (obtained for concentrations superior to the calibration curve).

**Table S2.** Retention time (RT) and detection conditions by tandem mass spectrometry.

| Compound structure                   | RT (min) | Precursor ion ( <i>m/z</i> )                          | Collision energy (eV) | Daughter ion ( <i>m/z</i> )                                                             |
|--------------------------------------|----------|-------------------------------------------------------|-----------------------|-----------------------------------------------------------------------------------------|
| <b>Ethanethiol (EtSH)</b>            | 4.82     | 62 [M] <sup>+</sup>                                   | 15                    | 29 [M-SH] <sup>+</sup>                                                                  |
|                                      |          | 62 [M] <sup>+</sup>                                   | 10                    | 47 [M-CH <sub>3</sub> ] <sup>+</sup>                                                    |
| <b>Dimethyl sulfide (DMS)</b>        | 5.04     | 62 [M] <sup>+</sup>                                   | 15                    | 47 [M-CH <sub>3</sub> ] <sup>+</sup>                                                    |
| <b>Diethyl sulfide (DES)</b>         | 11.08    | 90 [M] <sup>+</sup>                                   | 10                    | 62 [M-H <sub>2</sub> C=CH <sub>2</sub> ] <sup>+</sup>                                   |
|                                      |          | 90 [M] <sup>+</sup>                                   | 15                    | 75 [M-H <sub>2</sub> C=CH <sub>2</sub> ] <sup>+</sup>                                   |
|                                      |          | 75 [M-H <sub>2</sub> C=CH <sub>2</sub> ] <sup>+</sup> | 10                    | 47 [M-C <sub>2</sub> H <sub>4</sub> -CH <sub>3</sub> ] <sup>+</sup>                     |
| <b>Thiophene (Internal Standard)</b> | 16.35    | 84 [M] <sup>+</sup>                                   | 25                    | 45 [M-C <sub>3</sub> H <sub>3</sub> ] <sup>+</sup>                                      |
|                                      |          | 84 [M] <sup>+</sup>                                   | 20                    | 58 [M-C <sub>2</sub> H <sub>2</sub> ] <sup>+</sup>                                      |
| <b>S-methyl thioacetate (SMTA)</b>   | 17.07    | 90 [M] <sup>+</sup>                                   | 5                     | 43 [M-S-CH <sub>3</sub> ] <sup>+</sup>                                                  |
| <b>Dimethyl disulfide (DMDS)</b>     | 17.66    | 94 [M] <sup>+</sup>                                   | 35                    | 64 [M-CH <sub>3</sub> -CH <sub>3</sub> ] <sup>+</sup>                                   |
|                                      |          | 94 [M] <sup>+</sup>                                   | 15                    | 79 [M-CH <sub>3</sub> ] <sup>+</sup>                                                    |
| <b>S-ethyl thioacetate (ETA)</b>     | 17.96    | 104 [M] <sup>+</sup>                                  | 10                    | 43 [M-S-CH <sub>2</sub> -CH <sub>3</sub> ] <sup>+</sup>                                 |
|                                      |          | 104 [M] <sup>+</sup>                                  | 10                    | 61 [M-H <sub>3</sub> C-C=O] <sup>+</sup>                                                |
| <b>Diethyl disulfide (DEDS)</b>      | 20.69    | 122 [M] <sup>+</sup>                                  | 2                     | 94 [M-H <sub>2</sub> C=CH <sub>2</sub> ] <sup>+</sup>                                   |
|                                      |          | 94 [M-H <sub>2</sub> C=CH <sub>2</sub> ] <sup>+</sup> | 2                     | 66 [M-H <sub>2</sub> C=CH <sub>2</sub> -H <sub>2</sub> C=CH <sub>2</sub> ] <sup>+</sup> |
